# Supplementary material for: Enhancing protein-vitamin binding residues prediction by multiple heterogeneous subspace SVMs ensemble
Source: PubMed Central journal article supplement (PMC4261549; doi:10.1186/1471-2105-15-297), 2014-09-05
Supplement: 12859_2014_6690_MOESM1_ESM.pdf [file 12859_2014_6690_MOESM1_ESM.pdf]

## Additional File 1: Datasets Used in This Study

# Enhancing Protein-Vitamin Binding Residues Prediction by Multiple Heterogeneous Subspace SVMs Ensemble

Dong-Jun Yu<sup>1,\*</sup>, Jun Hu<sup>1</sup>, Hui Yan<sup>1</sup>, Xi-Bei Yang<sup>1</sup>, and Jing-Yu Yang<sup>1</sup>

<sup>1</sup> School of Computer Science and Engineering, Nanjing University of Science and Technology,  
Xiaolingwei 200, Nanjing, China, 210094

<sup>2</sup> Institute of Image Processing and Pattern Recognition, Shanghai Jiao Tong University,  
Dongchuan Road 800, Shanghai, China, 200240

\* Address correspondence to D.J. Yu [njyudj@njust.edu.cn](mailto:njyudj@njust.edu.cn) or H.B. Shen at [hbshen@sjtu.edu.cn](mailto:hbshen@sjtu.edu.cn)

Tel: +86-21-34205320

Fax: +86-21-34204022

## CONTENTS

|                                           |     |
|-------------------------------------------|-----|
| READ ME.....                              | 2   |
| DVI Training Dataset.....                 | 3   |
| DVI Independent Validation Dataset.....   | 54  |
| DVAI Training Dataset.....                | 65  |
| DVAI Independent Validation Dataset.....  | 71  |
| DVBI Training Dataset.....                | 73  |
| DVBI Independent Validation Dataset.....  | 115 |
| DPLPI Training Dataset.....               | 122 |
| DPLPI Independent Validation Dataset..... | 144 |
| Non-vitamin Binding Dataset (NVD).....    | 149 |
