# Supplementary material for: Enhancing protein-vitamin binding residues prediction by multiple heterogeneous subspace SVMs ensemble
Source: PubMed Central journal article supplement (PMC4261549; doi:10.1186/1471-2105-15-297), 2014-09-05
Supplement: 12859_2014_6690_MOESM2_ESM.pdf [file 12859_2014_6690_MOESM2_ESM.pdf]

# Additional file 2: Table S1-S2

## **Enhancing Protein-Vitamin Binding Residues Prediction by Multiple Heterogeneous Subspace SVMs Ensemble**

Dong-Jun Yu<sup>1,\*</sup>, Jun Hu<sup>1</sup>, Hui Yan<sup>1</sup>, Xi-Bei Yang<sup>1</sup>, and Jing-Yu Yang<sup>1</sup>

<sup>1</sup> School of Computer Science and Engineering, Nanjing University of Science and Technology,  
Xiaolingwei 200, Nanjing, China, 210094

<sup>2</sup> Institute of Image Processing and Pattern Recognition, Shanghai Jiao Tong University,  
Dongchuan Road 800, Shanghai, China, 200240

\* Address correspondence to D.J. Yu [njyudj@njust.edu.cn](mailto:njyudj@njust.edu.cn) or H.B. Shen at [hbshen@sjtu.edu.cn](mailto:hbshen@sjtu.edu.cn)

Tel: +86-21-34205320

Fax: +86-21-34204022
